# Supplementary material
Source: PubMed Central journal article supplement (PMC6016800)
Supplement: pnas.1803220115.sapp.pdf [file pnas.1803220115.sapp.pdf]

Supplementary Information Appendix

## Regulation of Stringent Factor by Branched-Chain Amino Acids

Mingxu Fang and Carl E. Bauer

Molecular and Cellular Biochemistry Department, Indiana University, Bloomington, IN 47405

Corresponding author:

Dr. Carl Bauer  
Professor and Chairman  
Department of Molecular and Cellular Biochemistry  
Indiana University  
Simon Hall MSB, 212 S. Hawthorne Dr.  
Bloomington, IN 47405-7003

Office: 812-855-6595  
Cell: 812-327-9053  
Fax: 812-856-5710  
Email: [bauer@indiana.edu](mailto:bauer@indiana.edu)

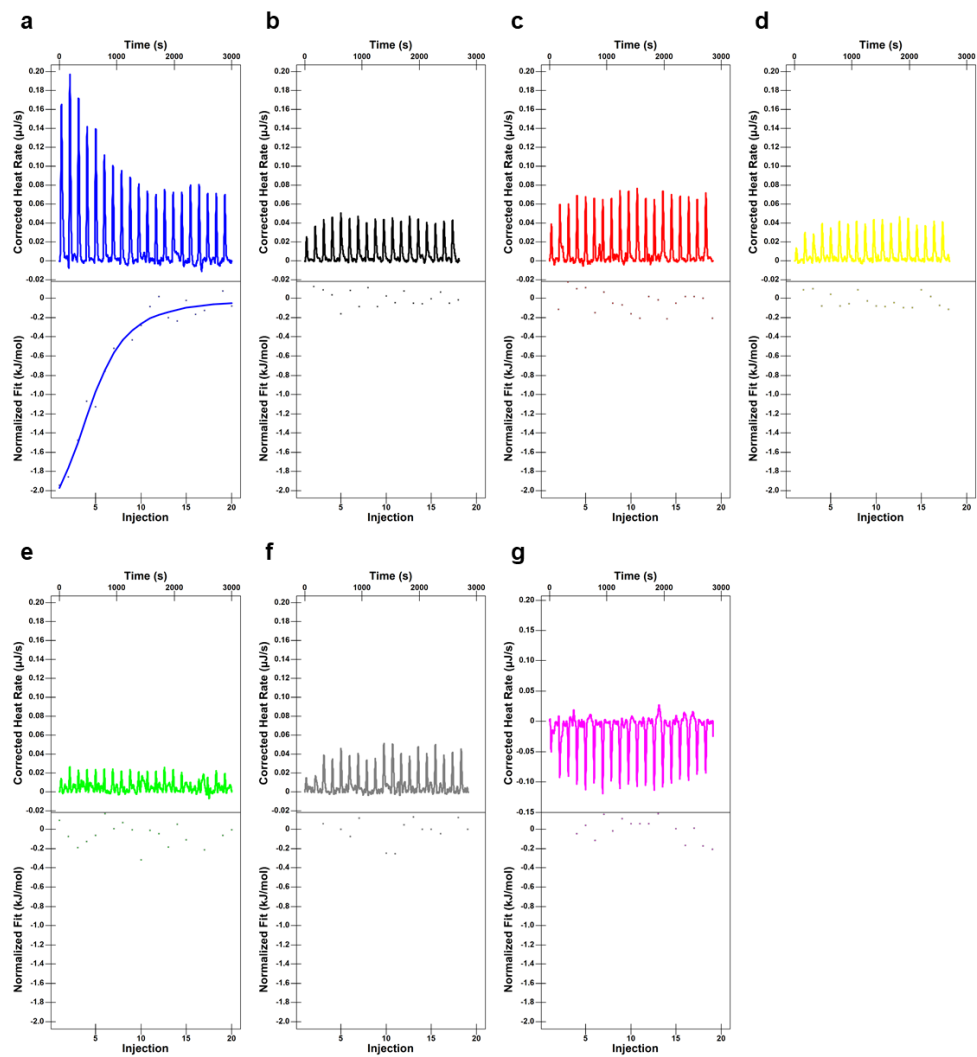

**Fig. S1.** ITC experiments between 20 amino acids and RcRel<sub>385-705</sub>. 20 amino acids (10 mM) were divided into 7 groups (A: Val, Leu, Ile; B: Ala, Met, Pro; C: Asp, Glu; D: Gly, Phe, Trp; E: Tyr, Asn, Gln; F: His, Arg, Lys; G: Ser, Thr, Cys) to titrate RcRel<sub>385-705</sub>.

**Table S1.** Effect of different divalent cations on hydrolase activity of RcRel.

| Cation           | RcRel hydrolase activity |
|------------------|--------------------------|
| Zn <sup>2+</sup> | +                        |
| Ni <sup>2+</sup> | -                        |
| Mn <sup>2+</sup> | +++                      |
| Mg <sup>2+</sup> | +++                      |
| Cu <sup>2+</sup> | -                        |
| Co <sup>2+</sup> | ++                       |
| Ca <sup>2+</sup> | +                        |

**Table S2. Kinetics parameters of RcRel hydrolase with branched-chain amino acids.**

|      | Vmax ( $\mu\text{mol min}^{-1} \text{mg}^{-1}$ ) | Km ( $\mu\text{M}$ ) |
|------|--------------------------------------------------|----------------------|
| Apo  | 3.5 $\pm$ 0.2                                    | 63.0 $\pm$ 12.8      |
| +Val | 20.8 $\pm$ 0.6                                   | 70.5 $\pm$ 6.5       |
| +Ile | 17.5 $\pm$ .07                                   | 62.0 $\pm$ 7.7       |
| +Leu | 5.3 $\pm$ 0.2                                    | 69.9 $\pm$ 7.3       |

Data represented as best-fit values to Michaelis-Menton equation  $\pm$  standard errors

**Table S3.** *In vivo* concentrations of amino acids in *R. capsulatus* cells grown in either PY or RCV medium. Data were represented as mean (n=3)  $\pm$  standard errors.

|            | [In PY] ( $\mu$ M)                   | [In RCV] ( $\mu$ M)              | [In PY] / [In RCV] |
|------------|--------------------------------------|----------------------------------|--------------------|
| Ala        | 505.1 $\pm$ 19.2                     | 514.1 $\pm$ 74.2                 | 1.0                |
| Gly        | 668.6 $\pm$ 72.5                     | 636.3 $\pm$ 92.7                 | 1.1                |
| <b>Val</b> | <b>3242.4 <math>\pm</math> 140.2</b> | <b>59.6 <math>\pm</math> 6.7</b> | <b>54.4</b>        |
| <b>Leu</b> | <b>1509.8 <math>\pm</math> 102.2</b> | <b>55.6 <math>\pm</math> 7.6</b> | <b>27.2</b>        |
| <b>Ile</b> | <b>656.2 <math>\pm</math> 54.6</b>   | <b>32.9 <math>\pm</math> 3.2</b> | <b>19.9</b>        |
| Pro        | 228.2 $\pm$ 15.4                     | 147.3 $\pm$ 7.0                  | 1.5                |
| Met        | 107.7 $\pm$ 27.1                     | 47.6 $\pm$ 7.7                   | 2.3                |
| Ser        | 163.8 $\pm$ 19.4                     | 108.7 $\pm$ 9.2                  | 1.5                |
| Thr        | 1305.9 $\pm$ 34.1                    | 391.7 $\pm$ 48.0                 | 3.3                |
| Phe        | 531.9 $\pm$ 65.5                     | 119.4 $\pm$ 16.4                 | 4.5                |
| Asp        | 307.9 $\pm$ 36.4                     | 180.6 $\pm$ 14.9                 | 1.7                |
| Glu        | 2108.7 $\pm$ 88.2                    | 8951.1 $\pm$ 946.7               | 0.2                |
| Lys        | 4163.9 $\pm$ 1494.9                  | 644.0 $\pm$ 366.7                | 6.5                |
| His        | 283.2 $\pm$ 91.4                     | 137.3 $\pm$ 2.8                  | 2.1                |
| Tyr        | 165.7 $\pm$ 17.9                     | 52.4 $\pm$ 2.2                   | 3.2                |

**Table S4.** Thermodynamic parameters obtained from Isothermal Titration Calorimetry experiments.

| Protein                  | Ligand | $\Delta H$ (kJ/mol) | $T\Delta S$ (kJ/mol) | $\Delta G$ (kJ/mol) |
|--------------------------|--------|---------------------|----------------------|---------------------|
| <i>R. capsulatus</i> Rel | Val    | -14.07              | 13.90                | -27.97              |
| <i>R. capsulatus</i> Rel | Ile    | -7.32               | 13.89                | -21.21              |
| <i>E. coli</i> RelA      | Val    | -23.53              | 8.14                 | -31.67              |
| <i>R. centenum</i> Rel   | Val    | -23.41              | -2.46                | -20.95              |
| <i>R. centenum</i> Rel   | Ile    | -11.43              | 5.69                 | -17.12              |
| <i>B. subtilis</i> Rel   | Leu    | -9.19               | 11.62                | -20.81              |
| <i>S. aureus</i> Rel     | Leu    | -14.09              | 5.94                 | -20.03              |

**Table S5:** Primer list

*Rhodobacter capsulatus* SB1003

Rel F NdeI ACTGCATATGATCGATGTCGAAGACCTGA  
Rel 624 F NdeI CCGGTCTACATATGTCGGTGGCGCTGAAGATCACC  
Rel Strep R SacI TGCCTTGAGCTCCCTCActtttcgaactgcgggtggctccagctcgcGGGTTGCGCGACAGGTCCG  
Rel 381 Strep F NdeI GGAGATATACATATGtgagaccaccgcagttcgaagGAGATGTATCCGATCAGGT  
Rel R SacI TGCCTTGAGCTCCCTCAGGGTTGCGCGACAGGTC  
Rel N651A mutagenesis F CGGGGCGCAGAAAGCCGCTATCTCCGACCTTCAT  
Rel N651A mutagenesis R ATGAAGGTCGAGATAGCGGCTTCTGCGCCCG  
N651A 1kb F XbaI TCGGTCTAGATGATCACGGCGCCGGCAGC  
N651A 1kb R SacI CAAAGAGCTCAGCAGCCCGCGGCATGGGC

*Escherichia coli* K-12

RelA 400 Strep F NdeI GGAGATATACATATGtgagaccaccgcagttcgaagCAGGTCTTGACGACCGGGT  
RelA R SacI CAAATTGAGCTCGGCTAACTCCCGTCAACCGACGCGCG  
SpoT 382 Strep F NdeI GGAGATATACATATGtgagaccaccgcagttcgaagGATCTCTCCCGATGAGATT  
SpoT R SacI CAAATTGAGCTCGGCTTAATTCGGTTTCGGGTGACTTT

*Bacillus subtilis* PY79

Rel 388 Strep F NcoI GGAGATATACCATGGcgtagaccaccgcagttcgaagGATTTGTTCTCTGACATGG  
Rel R SacI CAAATTGAGCTCGGCTTAGTTCATGACGCGGCACAG

*Rhodospirillum centenum* SW

Rel 396 Strep F NdeI GGAGATATACATATGtgagaccaccgcagttcgaagGAACTGTTCCAGGACAGGTC  
Rel R SacI TGCCTTGAGCTCCCTCAGCGCTTCTTGACGCT

*Deinococcus radiodurans* R1

Rel 454 Strep F NdeI GGAGATATACATATGtgagaccaccgcagttcgaagCAGCGGGTGTGGGTCTTCAC  
Rel R SacI TGCCTTGAGCTCCCCTAGGCCGCTTCGCCCA

*Enterococcus faecalis*

Rel 388 Strep F NdeI GGAGATATACATATGtgagaccaccgcagttcgaagGAAGACATTTTTAGCGACAA  
Rel R SacI TGCCTTGAGCTCCCTACCATTGGTTCGACGAAC

*Staphylococcus aureus* Newman

Rel 394 Strep F NcoI AGATATACCATGGCGtagaccaccgcagttcgaagAAATATGACTTACAGAGTGAC  
Rel R SacI TGCCTTGAGCTCCCTAGTTCAAACTCTTGTTAC

*Vibrio harveyi*

RelA 396 Strep F NdeI GGAGATATACATATGtgagaccaccgcagttcgaagCAGGTATTTGATGACCGGT  
RelA R SacI CAAATTGAGCTCGGCTTAGCCTAAGCGCTTACCGA  
SpoT 383 Strep F NdeI GGAGATATACATATGtgagaccaccgcagttcgaagGATCTTTCCAGATGAGATT  
SpoT R SacI CAAATTGAGCTCGGCTTAGTCTTTCTGCTGAC

*Pseudomonas aeruginosa* PAO1

RelA 410 Strep F NdeI GGAGATATACATATGtgagaccaccgcagttcgaagGATATCGAGCCGGACAGGGTC  
RelA R SacI CAAATTGAGCTCGGCTCAAGGCGTACGGTTGCGCG  
SpoT 382 Strep F NdeI GGAGATATACATATGtgagaccaccgcagttcgaagGACCTGTTCCCGACGAGGTC  
SpoT R SacI CAAATTGAGCTCGGCTCAGCTACGCGGGTGA

*Caulobacter crescentu s* CB15

Rel 408 Strep F NdeI GGAGATATACATATGtgagaccaccgcagttcgaagGAGATGTTCTCGACCAGGTT  
Rel R EcoRI TGCCTTGAATCCCTACCCCGCTCCGTCCA

Restriction sites are highlighted in red.

Strep tag sequences are in lower case.
